# Supplementary material for: Brain-Specific Gene Expression and Quantitative Traits Association Analysis for Mild Cognitive Impairment
Source: MDPI journal article supplement (doi:10.3390/biomedicines9060658), 2021-06-08
Supplement: s1 [file s1]

Table S1: Function ARegion StructureGene Chromosome Gene Type SNPBP Location

| Region               | Structures     | Overlap genes                              | Annotations       | Potential mechanism                                                                              |   |                              |
|----------------------|----------------|--------------------------------------------|-------------------|--------------------------------------------------------------------------------------------------|---|------------------------------|
| Limbic Region        | Amygdala       | NDUFAF3                                    | MCI               | assembly of mitochondrial complex                                                                |   |                              |
|                      |                | NOXRED1                                    | -                 | NADP-dependent oxidoreductase                                                                    |   |                              |
|                      |                | AHSA1                                      | AD/MCI            | cell growth, apoptosis and migration                                                             |   |                              |
|                      |                | MYL6B                                      | -                 | cell adhesion, cell migration and tissue architecture, cargo transport and endocytosis           |   |                              |
|                      | Hippocampus    | VAPA                                       | AD/MCI            | vesicular neurotransmission, membrane fusion, protein complex assembly and cell motility         |   |                              |
|                      |                | ME3                                        | MCI               | cell growth and cellular senescence                                                              |   |                              |
|                      |                | AGK                                        | AD/MCI            | function in the mitochondria                                                                     |   |                              |
|                      |                | FAM162B                                    | -                 | apoptosis                                                                                        |   |                              |
|                      |                | EPHA4                                      | AD/MCI            | synaptic plasticity                                                                              |   |                              |
|                      |                | PTH1R                                      | AD/MCI            | regulate blood calcium homeostasis                                                               |   |                              |
| Basal ganglia Region | Accumbens.area | IPO7                                       | AD                | autonomous nuclear transport receptor or as an adapter-like protein                              |   |                              |
|                      |                | GTPBP8                                     | AD                | mitochondrial translation and mitochondrial bioenergetics                                        |   |                              |
|                      | Caudate        | RELCH                                      | -                 | intracellular cholesterol distribution                                                           |   |                              |
|                      |                | IRX3                                       | -                 | neural development                                                                               |   |                              |
|                      |                | CLCNKB                                     | MCI               | cell volume, membrane potential stabilization, signal transduction and transepithelial transport |   |                              |
|                      |                | IL23A                                      | AD/MCI            | immune inflammatory                                                                              |   |                              |
|                      |                | RELL1                                      | -                 | inflammatory response                                                                            |   |                              |
|                      |                | TMEM50A                                    | -                 | unknown                                                                                          |   |                              |
|                      |                | SETD4                                      | -                 | methyltransferase activity                                                                       |   |                              |
|                      |                | ULBP3                                      | AD                | peptide antigen binding and natural killer cell lectin-like receptor binding                     |   |                              |
|                      | Putamen        | TMEM253                                    | -                 | unknown                                                                                          |   |                              |
|                      |                | ERCC4                                      | AD/MCI            | DNA repair                                                                                       |   |                              |
|                      |                | HPS3                                       | -                 | biogenesis Of Lysosomal Organelles                                                               |   |                              |
|                      |                | SLC26A10                                   | -                 | unknown                                                                                          |   |                              |
|                      |                | Cerebellum Region                          | Cerebellum.Cortex | SLC6A16                                                                                          | - | neurotransmitter transporter |
|                      |                |                                            |                   | SLC10A5                                                                                          | - | solute carrier               |
| ACAT2                | AD/MCI         |                                            |                   | lipid metabolism                                                                                 |   |                              |
| ZFYVE9               | MCI            |                                            |                   | neuronal migration                                                                               |   |                              |
| ENSG00000272542      | -              |                                            |                   | unknown                                                                                          |   |                              |
| ERBB2                | AD/MCI         |                                            |                   | neuritic plaques                                                                                 |   |                              |
| LINC00958            | -              |                                            |                   | unknown                                                                                          |   |                              |
| FCGRT                | -              |                                            |                   | mediates the asymmetric transcytosis of IgG across the blood-brain barrier                       |   |                              |
| TRPM4                | -              | calcium-activated nonselective ion channel |                   |                                                                                                  |   |                              |

Table S2: Genomic locations of cis-eQTL SNPs,

| Region       | Structure   | Gene    | Chromosome | Gene Type      | SNP         | BP        | Location                          |
|--------------|-------------|---------|------------|----------------|-------------|-----------|-----------------------------------|
| LimbicRegion | Amygdala    | NDUFAF3 | chr3       | protein_coding | rs7100      | 49053219  | 3downstream,3utr                  |
|              |             | NOXRED1 | chr14      | protein_coding | rs141260780 | 77890314  | 5upstream                         |
|              |             | NOXRED1 | chr14      | protein_coding | rs11846861  | 77889546  | intronic,5upstream                |
|              |             | AHSA1   | chr14      | protein_coding | rs11845345  | 77923783  | 5utr,intronic,non-coding intronic |
|              |             | MYL6B   | chr12      | antisense      | rs3809134   | 56546011  | non-coding intronic               |
|              | Hippocampus | VAPA    | chr18      | protein_coding | rs4798889   | 9913930   | 3downstream                       |
|              |             | ME3     | chr11      | protein_coding | rs670736    | 86383679  | 5upstream                         |
|              |             | AGK     | chr7       | antisense      | rs7790742   | 141250685 | non-coding intronic               |
|              |             | AGK     | chr7       | antisense      | rs7795885   | 141251044 | 5upstream,non-coding              |
|              |             | FAM162B | chr6       | protein_coding | rs9387433   | 117077450 | intronic                          |

|                    |               |                 |                |                                    |                                        |                                          |                                         |
|--------------------|---------------|-----------------|----------------|------------------------------------|----------------------------------------|------------------------------------------|-----------------------------------------|
| BasalGangliaRegion | AccumbensArea | FAM162B         | chr6           | protein_coding                     | rs641338                               | 117086265                                | intronic                                |
|                    |               | EPHA4           | chr2           | protein_coding                     | rs14963619                             | 222438915                                | 5utr,5upstream                          |
|                    |               | PTH1R           | chr3           | protein_coding                     | rs2168442                              | 46919379                                 | intronic                                |
|                    |               | PTH1R           | chr3           | protein_coding                     | rs144645644                            | 46934290                                 | intronic,non-coding                     |
|                    |               | IPO7            | chr11          | protein_coding                     | rs75955853                             | 9406129                                  | 3downstream                             |
|                    |               | IPO7            | chr11          | protein_coding                     | rs12363308                             | 9409801                                  | intronic                                |
|                    |               | GTPBP8          | chr3           | protein_coding                     | rs114429530                            | 112710133                                | coding nonsyn,5upstream                 |
|                    |               | RELCH           | chr18          | protein_coding                     | rs3752091                              | 59854253                                 | 5upstream,intronic,5utr,non-coding      |
|                    |               | RELCH           | chr18          | protein_coding                     | rs9958695                              | 59858801                                 | intronic                                |
|                    |               | IRX3            | chr16          | antisense                          | rs191251428                            | 54320835                                 | non-coding intronic                     |
|                    | Putamen       | CLCNKB          | chr1           | protein_coding                     | rs75909377                             | 16370712                                 | intronic                                |
|                    |               | IL23A           | chr12          | protein_coding                     | rs79824801                             | 56728137                                 | non-coding intronic                     |
|                    |               | RELL1           | chr4           | protein_coding                     | rs4832933                              | 37688443                                 | 5upstream                               |
|                    |               | TMEM50A         | chr1           | protein_coding                     | rs3093586                              | 25668826                                 | 5upstream,non-coding intronic,intronic  |
|                    |               | TMEM50A         | chr1           | protein_coding                     | rs3091243                              | 25669057                                 | 5upstream,non-coding intronic,intronic  |
|                    |               | TMEM50A         | chr1           | protein_coding                     | rs8876                                 | 25687308                                 | 3utr,non-coding                         |
|                    |               | SETD4           | chr21          | protein_coding                     | rs2835263                              | 37430245                                 | 5upstream,non-coding intronic,intronic  |
|                    |               | SETD4           | chr21          | protein_coding                     | rs142847892                            | 37451298                                 | intronic                                |
|                    |               | ULBP3           | chr6           | protein_coding                     | rs1537648                              | 150389924                                | intronic                                |
|                    |               | TMEM253         | chr14          | None                               | rs10872886                             | 21574690                                 | None                                    |
| CerebellumRegion   | Cerebellum    | ERCC4           | chr16          | protein_coding                     | rs6498486                              | 14013666                                 | 3downstream                             |
|                    |               | ERCC4           | chr16          | protein_coding                     | rs3136042                              | 14014055                                 | coding syn syn,non-coding               |
|                    |               | ERCC4           | chr16          | protein_coding                     | rs1799798                              | 14014278                                 | intronic,non-coding intronic            |
|                    |               | HPS3            | chr3           | protein_coding                     | rs13089410                             | 148847441                                | non-coding,5utr,5upstream               |
|                    |               | HPS3            | chr3           | protein_coding                     | rs7643410                              | 148848073                                | non-coding intronic,intronic,non-coding |
|                    |               | SLC26A10        | chr12          | None                               | rs10747780                             | 57980541                                 | None                                    |
|                    |               | SLC26A10        | chr12          | None                               | rs10437954                             | 58003922                                 | None                                    |
|                    |               | SLC6A16         | chr19          | protein_coding                     | rs8102658                              | 49828855                                 | 5upstream                               |
|                    |               | SLC10A5         | chr8           | TEC                                | rs2955002                              | 82608878                                 | non-coding                              |
|                    |               | SLC10A5         | chr8           | TEC                                | rs58379275                             | 82609783                                 | non-coding                              |
|                    | SLC10A5       | chr8            | protein_coding | rs75348453                         | 82626146                               | intronic,non-coding intronic,3downstream |                                         |
|                    | Cerebellum    | ACAT2           | chr6           | protein_coding                     | rs2025187                              | 160181435                                | intronic                                |
|                    |               | ZFYVE9          | chr1           | protein_coding                     | rs627011                               | 52608109                                 | non-coding intronic,intronic            |
|                    |               | ENSG00000272542 | chr13          | transcribed_unprocessed_pseudogene | rs1886087                              | 103535828                                | non-coding intronic                     |
|                    |               | ENSG00000272542 | chr13          | transcribed_unprocessed_pseudogene | rs9518861                              | 103541616                                | 5upstream,non-coding intronic           |
|                    |               | ENSG00000272542 | chr13          | transcribed_unprocessed_pseudogene | rs9554903                              | 103542220                                | non-coding intronic,5upstream           |
|                    |               | ERBB2           | chr17          | protein_coding                     | rs2517955                              | 37843681                                 | non-coding intronic,intronic            |
|                    |               | ERBB2           | chr17          | protein_coding                     | rs75849983                             | 37843762                                 | non-coding intronic,intronic            |
|                    |               | LINC00958       | chr11          | lincRNA                            | rs4756736                              | 13014898                                 | 5upstream                               |
|                    |               | FCGRT           | chr19          | protein_coding                     | rs2946865                              | 50010378                                 | non-coding intronic                     |
| FCGRT              |               | chr19           | protein_coding | rs1132990                          | 50028163                               | 3downstream,3utr,intronic,non-coding     |                                         |
| TRPM4              | chr19         | protein_coding  | rs11882563     | 49661547                           | non-coding intronic,intronic,3utr      |                                          |                                         |
| TRPM4              | chr19         | protein_coding  | rs11083963     | 49665340                           | non-coding intronic,intronic           |                                          |                                         |
| TRPM4              | chr19         | protein_coding  | rs73048855     | 49669561                           | non-coding intronic,5upstream,intronic |                                          |                                         |

Table S3: Annotations from HaploReg and RegulomeDB database,

|                         |                   | chr | pos<br>(hg38) | variant         | Promoter<br>histone marks | Enhancer<br>histone marks | DNase             | Proteins bound             | Motifs changed    | RegulomeD<br>B Rank |
|-------------------------|-------------------|-----|---------------|-----------------|---------------------------|---------------------------|-------------------|----------------------------|-------------------|---------------------|
| Limbic Region           | Amygdala          | 3   | 4901578<br>6  | rs7100          |                           | SKIN, BRST                | SKIN, SKI<br>N    |                            | Irf, SP1, SREBP   | 4                   |
|                         |                   | 14  | 7742397<br>1  | rs141260<br>780 |                           |                           |                   |                            | CACD, Isl2, Pax-4 | 7                   |
|                         |                   | 14  | 7742320<br>3  | rs118468<br>61  |                           |                           |                   |                            |                   | 5                   |
|                         |                   | 14  | 7745744<br>0  | rs118453<br>45  | 24 tissues                |                           | 46 tissues        | 9 bound proteins           | AP-1              | 4                   |
|                         | Hippocampus       | 12  | 5615222<br>7  | rs380913<br>4   | 24 tissues                |                           | 52 tissues        |                            | 5 altered motifs  | 4                   |
|                         |                   | 18  | 9913933<br>9  | rs479888<br>9   | 24 tissues                |                           | 53 tissues        | 17 bound proteins          | BDP1, HEY1, Pax-5 | 4                   |
|                         |                   | 11  | 8667263<br>7  | rs670736        | 22 tissues                | 7 tissues                 | 26 tissues        |                            | 4 altered motifs  | 4                   |
|                         |                   | 7   | 1415508<br>85 | rs779074<br>2   | 24 tissues                |                           | 30 tissues        |                            | PU.1              | 4                   |
|                         |                   | 7   | 1415512<br>44 | rs779588<br>5   | 24 tissues                |                           | 41 tissues        | 24 bound proteins          | AP-2, Rad21, YY1  | 4                   |
|                         |                   | 6   | 1167562<br>87 | rs938743<br>3   |                           |                           |                   |                            | Nr2e3             | 5                   |
|                         |                   | 6   | 1167651<br>02 | rs641338        | 21 tissues                | BLD, GI, SPLN             | 6 tissues         | SUZ12                      | 7 altered motifs  | 2c                  |
|                         |                   | 2   | 2215741<br>91 | rs149636<br>195 | 22 tissues                | 4 tissues                 | 41 tissues        |                            |                   | 4                   |
|                         |                   | 3   | 4687788<br>9  | rs216844<br>2   |                           | 11 tissues                |                   |                            | 5 altered motifs  | 4                   |
|                         |                   | 3   | 4689280<br>0  | rs144645<br>644 | 19 tissues                | 12 tissues                | 9 tissues         |                            |                   | 4                   |
|                         |                   | 11  | 9384582<br>53 | rs759558<br>53  | 24 tissues                | HRT                       | 53 tissues        | 42 bound proteins          | 11 altered motifs | 2a                  |
|                         |                   | 11  | 9388254<br>08 | rs123633<br>08  |                           | ESDR, BLD,<br>SKIN        |                   |                            | 6 altered motifs  | 4                   |
|                         |                   | 3   | 1129912<br>86 | rs114429<br>530 | 24 tissues                |                           | 52 tissues        | 30 bound proteins          | 6 altered motifs  | 2a                  |
| Basal ganglia<br>Region | Accumbens<br>area | 18  | 6218702<br>0  | rs375209<br>1   | 24 tissues                |                           | 53 tissues        | 17 bound proteins          | 8 altered motifs  | 2b                  |
|                         |                   | 18  | 6219156<br>8  | rs995869<br>5   | ESDR                      | 5 tissues                 | BLD               |                            | ELF1, Mef2, Spz1  | 7                   |
|                         |                   | 16  | 5428692<br>3  | rs191251<br>428 | 22 tissues                | 9 tissues                 | 38 tissues        | POL24H8, HAE2F<br>1        | 9 altered motifs  | 2a                  |
|                         |                   | 1   | 1604421<br>7  | rs759093<br>77  |                           | 5 tissues                 |                   |                            | 5 altered motifs  | 4                   |
|                         |                   | 12  | 5633435<br>3  | rs798248<br>01  | 24 tissues                |                           | 53 tissues        | 12 bound proteins          | BCL, Ik-2         | 4                   |
|                         |                   | 4   | 3768640<br>5  | rs383230<br>8   | 24 tissues                |                           | 53 tissues        | 12 bound proteins          | 22 altered motifs | 2a                  |
|                         |                   | 4   | 3768682<br>1  | rs483293<br>3   | 24 tissues                |                           | 53 tissues        | 5 bound proteins           | 4 altered motifs  | 2b                  |
|                         |                   | 1   | 2534233<br>5  | rs309358<br>6   |                           | 6 tissues                 |                   |                            | PLZF              | 7                   |
|                         |                   | 1   | 2534256<br>6  | rs309124<br>3   |                           | 6 tissues                 |                   |                            | E2F, Pou2f2       | 5                   |
|                         |                   | 1   | 2536081<br>7  | rs8876          |                           | 9 tissues                 | ESDR, LNC,<br>BRN | CEBPB                      |                   | 4                   |
|                         | Caudate           | 21  | 3605794<br>7  | rs283526<br>3   |                           | 8 tissues                 | BLD, BLD          |                            | 5 altered motifs  | 7                   |
|                         |                   | 21  | 3607900<br>0  | rs142847<br>892 | BLD, GI                   | 8 tissues                 |                   | STAT2                      | PLZF, ZBTB33      | 5                   |
|                         |                   | 6   | 1500687<br>88 | rs153764<br>8   | 24 tissues                |                           | 20 tissues        |                            | 6 altered motifs  | 4                   |
|                         |                   | 14  | 2110653<br>1  | rs108728<br>86  |                           |                           | 20 tissues        | AP2ALPHA, BAF<br>155, BRG1 |                   | 4                   |

|                      |            |              |               |                 |                   |                      |                  |                   |                                 |    |
|----------------------|------------|--------------|---------------|-----------------|-------------------|----------------------|------------------|-------------------|---------------------------------|----|
| Cerebellum<br>Region | Cerebellum | 16           | 1391980<br>9  | rs649848<br>6   | 23 tissues        | 5 tissues            | 52 tissues       | 16 bound proteins | CEBPB,Nanog                     | 2b |
|                      |            | 16           | 1392019<br>8  | rs313604<br>2   | 24 tissues        |                      | 53 tissues       | 20 bound proteins | Mxi1,SREBP                      | 3a |
|                      |            | 16           | 1392042<br>1  | rs179979<br>8   | 24 tissues        |                      | 40 tissues       | POL2              |                                 | 4  |
|                      |            | 3            | 1491296<br>54 | rs130894<br>10  | 24 tissues        |                      | 53 tissues       | 35 bound proteins | 4 altered motifs                | 4  |
|                      |            | 3            | 1491302<br>86 | rs764341<br>0   | 23 tissues        | SPLN                 | 24 tissues       |                   | CEBPB,Zfp105                    | 2b |
|                      |            | 12           | 5758675<br>8  | rs107477<br>80  |                   |                      |                  |                   | 7 altered motifs                | 4  |
|                      |            | 12           | 5761013<br>9  | rs104379<br>54  |                   |                      | 10 tissues       |                   | NF-<br>kappaB,Zfp161,Zn<br>f143 | 4  |
|                      |            | 19           | 4932559<br>8  | rs810265<br>8   |                   | BLD                  | BLD,BLD          |                   |                                 | 5  |
|                      |            | 8            | 8169664<br>3  | rs295500<br>2   |                   |                      |                  |                   | 5 altered motifs                | 1f |
|                      |            | 8            | 8169754<br>8  | rs583792<br>75  |                   |                      |                  |                   | AP-1,BDP1,Maf                   | 4  |
|                      |            | 8            | 8171391<br>1  | rs753484<br>53  |                   |                      |                  |                   | Mef2                            | 5  |
|                      |            | 6            | 1597604<br>03 | rs202518<br>7   | 4 tissues         | 18 tissues           | ESC,KID          | POL2              | LUN-1,Osrf,Pitx2                | 3a |
|                      |            | 1            | 5214243<br>7  | rs627011        | 24 tissues        |                      | 20 tissues       | 4 bound proteins  | 14 altered motifs               | 4  |
|                      |            | 13           | 1028834<br>78 | rs188608<br>7   |                   |                      |                  |                   | EWSR1-<br>FLI1,HDAC2,Spde<br>f  | 6  |
|                      |            | 13           | 1028892<br>66 | rs951886<br>1   |                   |                      |                  |                   |                                 | 7  |
|                      |            | 13           | 1028898<br>70 | rs955490<br>3   |                   |                      |                  |                   | Foxp3                           | 7  |
|                      |            | 17           | 3968742<br>8  | rs251795<br>5   | 21 tissues        | 10 tissues           | 19 tissues       | 6 bound proteins  | 7 altered motifs                | 2a |
|                      |            | 17           | 3968750<br>9  | rs758499<br>83  | 21 tissues        | 10 tissues           | 21 tissues       | 4 bound proteins  | LBP-1                           | 4  |
|                      |            | 11           | 1298953<br>3  | rs111880<br>988 | 6 tissues         | ESDR, BLD            | 13 tissues       | 27 bound proteins | EWSR1-<br>FLI1,PRDM1,TFII-<br>I | 4  |
|                      |            | 11           | 1299335<br>1  | rs475673<br>6   |                   | BRST, SKIN,<br>BLD   |                  |                   | 4 altered motifs                | 6  |
|                      |            | 19           | 4950712<br>1  | rs294686<br>5   | ESC, iPSC, BLD    | 6 tissues            | iPSC,BLD,<br>BLD |                   | AhR,CHOP::CEBP<br>alpha         | 5  |
|                      |            | 19           | 4952490<br>6  | rs113299<br>0   |                   | iPSC, PLCNT,<br>SPLN |                  |                   | Pbx3,Tgfb1,ZBTB33               | 3a |
|                      |            | 19           | 4915829<br>0  | rs118825<br>63  | 24 tissues        | BLD                  | 23 tissues       | 5 bound proteins  | 9 altered motifs                | 4  |
|                      |            | 19           | 4916208<br>3  | rs110839<br>63  |                   | 10 tissues           | 5 tissues        | GATA2             | 21 altered motifs               | 3a |
|                      |            | 19           | 4916630<br>4  | rs730488<br>55  | 5 tissues         | 9 tissues            | ESDR,KID,<br>MUS |                   | HNF4,LXR,VDR                    | 2b |
|                      |            | <b>Total</b> |               | <b>56</b>       | <b>32 (57.1%)</b> | <b>29 (51.8%)</b>    |                  | <b>25 (44.6%)</b> | <b>49 (87.5%)</b>               |    |

Table S4: Annotations of promoters of cis-eQTL SNPs,

| Region       | Structure | Gene    | SNP         | BP       | CHR   | PromoterStart | PromoterEnd | Strand | Gene_name | Gene_id         | Gene_type      |
|--------------|-----------|---------|-------------|----------|-------|---------------|-------------|--------|-----------|-----------------|----------------|
| LimbicRegion | Amygdala  | NOXRED1 | rs141260780 | 77890314 | chr14 | 77887860      | 77890860    | -      | NOXRED1   | ENSG00000165555 | protein_coding |
|              |           | NOXRED1 | rs11846861  | 77889546 | chr14 | 77887860      | 77890860    | -      | NOXRED1   | ENSG00000165555 | protein_coding |

|                    |               |         |                      |           |          |           |           |   |         |                 |                |
|--------------------|---------------|---------|----------------------|-----------|----------|-----------|-----------|---|---------|-----------------|----------------|
| BasalGangliaRegion | Hippocampus   | AHSA1   | rs11845345           | 77923783  | chr14    | 77922213  | 77925213  | + | AHSA1   | ENSG00000100591 | protein_coding |
|                    |               | MYL6B   | rs3809134            | 56546011  | chr12    | 56544040  | 56547040  | + | MYL6B   | ENSG00000196465 | protein_coding |
|                    |               | VAPA    | rs4798889            | 9913930   | chr18    | 9911999   | 9914999   | + | VAPA    | ENSG00000101558 | protein_coding |
|                    |               | ME3     | rs670736             | 86383679  | chr11    | 86381678  | 86384678  | - | ME3     | ENSG00000151376 | protein_coding |
|                    |               | AGK     | rs7790742            | 141250685 | chr7     | 1.41E+08  | 141252078 | + | AGK     | ENSG00000006530 | protein_coding |
|                    |               | AGK     | rs7795885            | 141251044 | chr7     | 1.41E+08  | 141252078 | + | AGK     | ENSG00000006530 | protein_coding |
|                    | AccumbensArea | FAM162B | rs641338             | 117086265 | chr6     | 1.17E+08  | 117087882 | - | FAM162B | ENSG00000183807 | protein_coding |
|                    |               | EPHA4   | rs149636195222438911 | chr2      | 2.22E+08 | 222439922 |           | - | EPHA4   | ENSG00000116106 | protein_coding |
|                    |               | PTH1R   | rs2168442            | 46919379  | chr3     | 46917211  | 46920211  | + | PTH1R   | ENSG00000160801 | protein_coding |
|                    |               | IPO7    | rs75955853           | 9406129   | chr11    | 9404199   | 9407199   | + | IPO7    | ENSG00000205339 | protein_coding |
|                    |               | GTPBP8  | rs114429530112710133 | chr3      | 1.13E+08 | 112710831 |           | + | GTPBP8  | ENSG00000163607 | protein_coding |
|                    |               | RELCH   | rs3752091            | 59854253  | chr18    | 59852488  | 59855488  | + | RELCH   | ENSG00000134444 | protein_coding |
|                    | Caudate       | IRX3    | rs191251428          | 54320835  | chr16    | 54318699  | 54321699  | - | IRX3    | ENSG00000177508 | protein_coding |
|                    |               | CLCNKB  | rs75909377           | 16370712  | chr1     | 16368231  | 16371231  | + | CLCNKB  | ENSG00000184908 | protein_coding |
|                    |               | IL23A   | rs79824801           | 56728137  | chr12    | 56725958  | 56728958  | + | IL23A   | ENSG00000110944 | protein_coding |
|                    |               | RELL1   | rs4832933            | 37688443  | chr4     | 37685998  | 37688998  | - | RELL1   | ENSG00000181826 | protein_coding |
|                    |               | SETD4   | rs142847892          | 37451298  | chr21    | 37449687  | 37452687  | - | SETD4   | ENSG00000185917 | protein_coding |
|                    |               | ULBP3   | rs1537648            | 150389924 | chr6     | 1.5E+08   | 150391257 | - | ULBP3   | ENSG00000131019 | protein_coding |
|                    | Putamen       | ERCC4   | rs6498486            | 14013666  | chr16    | 14012014  | 14015014  | + | ERCC4   | ENSG00000175595 | protein_coding |
|                    |               | ERCC4   | rs3136042            | 14014055  | chr16    | 14012014  | 14015014  | + | ERCC4   | ENSG00000175595 | protein_coding |
|                    |               | ERCC4   | rs1799798            | 14014278  | chr16    | 14012014  | 14015014  | + | ERCC4   | ENSG00000175595 | protein_coding |
|                    |               | HPS3    | rs13089410           | 148847441 | chr3     | 1.49E+08  | 148848425 | + | HPS3    | ENSG00000163755 | protein_coding |
|                    |               | HPS3    | rs7643410            | 148848073 | chr3     | 1.49E+08  | 148848425 | + | HPS3    | ENSG00000163755 | protein_coding |
|                    |               | SLC6A16 | rs8102658            | 49828855  | chr19    | 49826472  | 49829472  | - | SLC6A16 | ENSG00000063127 | protein_coding |
| CerebellumRegion   | Cerebellum    | ACAT2   | rs2025187            | 160181435 | chr6     | 1.6E+08   | 160184077 | + | ACAT2   | ENSG00000120437 | protein_coding |
|                    |               | ZFYVE9  | rs627011             | 52608109  | chr1     | 52605766  | 52608766  | + | ZFYVE9  | ENSG00000157077 | protein_coding |
|                    |               | ERBB2   | rs2517955            | 37843681  | chr17    | 37842167  | 37845167  | + | ERBB2   | ENSG00000141736 | protein_coding |
|                    |               | ERBB2   | rs75849983           | 37843762  | chr17    | 37842167  | 37845167  | + | ERBB2   | ENSG00000141736 | protein_coding |
|                    |               | FCGRT   | rs2946865            | 50010378  | chr19    | 50008073  | 50011073  | + | FCGRT   | ENSG00000104870 | protein_coding |
|                    |               | TRPM4   | rs11882563           | 49661547  | chr19    | 49658998  | 49661998  | + | TRPM4   | ENSG00000130529 | protein_coding |
|                    |               |         |                      |           |          |           |           |   |         |                 |                |
|                    |               |         |                      |           |          |           |           |   |         |                 |                |

Table S5: Annotations of super enhancers of cis-eQTL SNPs,

| Region       | Structure | GE      | SN      | BP    | Chr            | En ha nc er Sta rt  | En ha nc er En t d  | Ra nk | Co Ele me nt | mm on SN P | Ris eQ TL SN P | TF _cas9_ t se_ val | Crisps ites | Ca trol _val | Con trol _val | Overlap_ gene              | Proximal_gene              | Clo sest _ge ne       | Close st _act ive | Data _so urce                 | Biosam ple_ type | Tissue_type   | Biosample_name |
|--------------|-----------|---------|---------|-------|----------------|---------------------|---------------------|-------|--------------|------------|----------------|---------------------|-------------|--------------|---------------|----------------------------|----------------------------|-----------------------|-------------------|-------------------------------|------------------|---------------|----------------|
| LimbicRegion | Amygdala  | M       | rs38565 | chr12 | YL0914606B3411 | 5655653685609378202 | 5655653725618505186 | 3     | 209          | 11         | 1              | 132                 | 1726        | 25762.29     | 2124.232      | MYL6B,S MARCC2, ESYT1,MYL6 | ESYT1,RPL41,PA2G4,SMA      | MYL6B                 | ENCODE            | Tissue                        | Adrenal gland    | adrenal-gland |                |
|              |           | M       | rs38565 | chr12 | YL0914606B3411 | 5655653725618505186 | 5655653725618505186 | 2     | 209          | 11         | 1              | 129                 | 1675        | 20538.79     | 1897.287      | MYL6B,S MARCC2, ESYT1,MYL6 | ESYT1,RPL41,PA2G4,SMA      | MYL6B                 | ENCODE            | Tissue                        | Peyers patch     | Peyers-patch  |                |
|              |           | M       | rs38565 | chr12 | YL0914606B3411 | 5655653645707289720 | 5655653645707289720 | 2     | 220          | 11         | 1              | 143                 | 1962        | 24549.61     | 3326.778      | MYL6B,S MARCC2, ESYT1,MYL6 | ESYT1,RPL41,PA2G4,SMA      | MYL6B                 | NCBI GEO/SRA      | Cell line                     | Umbilical vein   | HUVEC_VEGF_4h |                |
|              |           | M       | rs38565 | chr12 | YL0914606B3411 | 5655652597241851807 | 5655652597241851807 | 10    | 486          | 30         | 2              | 363                 | 4242        | 43634.58     | 7201.146      | MYL6B,S MARCC2, ESYT1,MYL6 | ESYT1,RPL41,PA2G4,SMA      | MYL6B                 | NCBI GEO/SRA      | Cell line                     | Other            | 90-8TL_DMSO   |                |
|              |           | M       | rs38565 | chr12 | YL0914606B3411 | 5655653685841166    | 5655653685841166    | 1052  | 4            | 228        | 11             | 1                   | 185         | 2182         | 7503.458      | 1847.172                   | MYL6B,S MARCC2, ESYT1,MYL6 | ESYT1,RPL41,PA2G4,SMA | MYL6B             | NCBI GEO/SRA                  | Other            | Skin          | NHEK_scramble  |
|              |           | M       | rs38565 | chr12 | YL0914606B3411 | 5655653665426259136 | 5655653665426259136 | 3     | 189          | 10         | 0              | 118                 | 1459        | 23826.11     | 2844.045      | MYL6B,E SYT1,MYL6          | ESYT1,RPL41,PA2G4,SMA      | MYL6B                 | NCBI GEO/SRA      | Cell line                     | Colon            | V456          |                |
|              |           | M       | rs38565 | chr12 | YL0914606B3411 | 5655653825524527491 | 5655653825524527491 | 3     | 192          | 11         | 1              | 119                 | 1378        | 33567.73     | 2084.583      | MYL6B,E SYT1,MYL6          | ESYT1,RPL41,PA2G4,SMA      | MYL6B                 | NCBI GEO/SRA      | Cell line                     | Colon            | V481          |                |
| Hippocampus  | VAMPAs    | rs47991 | 988393  | chr18 | 99199126271286 | 99199126271286      | 1145                | 1     | 64           | 8          | 0              | 34                  | 196         | 10373.74     | 767.3588      | VAPA                       | TXNDC2,VAPA                | VAPA                  | ENCODE            | In vitro differentiated cells | Liver            | hepatocyte    |                |

|         |         |        |        |         |     |     |     |     |     |       |       |       |      |             |             |          |                 |           |                     |                                                               |              |             |             |       |                 |           |            |               |               |             |             |       |                 |           |            |           |        |              |             |             |       |                 |           |                  |                     |              |
|---------|---------|--------|--------|---------|-----|-----|-----|-----|-----|-------|-------|-------|------|-------------|-------------|----------|-----------------|-----------|---------------------|---------------------------------------------------------------|--------------|-------------|-------------|-------|-----------------|-----------|------------|---------------|---------------|-------------|-------------|-------|-----------------|-----------|------------|-----------|--------|--------------|-------------|-------------|-------|-----------------|-----------|------------------|---------------------|--------------|
| VA PA   | rs47991 | chr9   | 991993 | 2860085 | 102 | 4   | 214 | 32  | 0   | 40    | 196   | 247   | 1812 | VAPA        | TXNDC2,VAPA | VA PA    | VAP A           | EN CO DE  | Primary cell        | Skin                                                          | keratinocyte |             |             |       |                 |           |            |               |               |             |             |       |                 |           |            |           |        |              |             |             |       |                 |           |                  |                     |              |
|         | 988393  | 18     | 5      | 0       | 5   | 4   | 214 | 32  | 0   | 40    | 196   | 22.46 | 74   |             |             |          |                 |           |                     |                                                               |              |             |             |       |                 |           |            |               |               |             |             |       |                 |           |            |           |        |              |             |             |       |                 |           |                  |                     |              |
|         | rs47991 | chr9   | 991993 | 283434  | 729 | 6   | 271 | 43  | 1   | 45    | 236   | 299   | 2715 |             |             |          |                 |           |                     |                                                               |              | VAPA        | TXNDC2,VAPA | VA PA | VAP A           | EN CO DE  | Tissue     | Adrenal gland | adrenal-gland |             |             |       |                 |           |            |           |        |              |             |             |       |                 |           |                  |                     |              |
|         | 988393  | 18     | 8      | 2       | 2   | 6   | 271 | 43  | 1   | 45    | 236   | 78.73 | 955  |             |             |          |                 |           |                     |                                                               |              |             |             |       |                 |           |            |               |               |             |             |       |                 |           |            |           |        |              |             |             |       |                 |           |                  |                     |              |
|         | rs47991 | chr9   | 991991 | 281693  | 945 | 1   | 60  | 8   | 0   | 34    | 196   | 295   | 535. |             |             |          |                 |           |                     |                                                               |              |             |             |       |                 |           |            |               |               | VAPA        | TXNDC2,VAPA | VA PA | VAP A           | EN CO DE  | Tissue     | Spleen    | spleen |              |             |             |       |                 |           |                  |                     |              |
|         | 988393  | 18     | 1      | 2       | 2   | 1   | 60  | 8   | 0   | 34    | 196   | 24.9  | 3179 |             |             |          |                 |           |                     |                                                               |              |             |             |       |                 |           |            |               |               |             |             |       |                 |           |            |           |        |              |             |             |       |                 |           |                  |                     |              |
|         | rs47991 | chr9   | 991992 | 284831  | 126 | 7   | 4   | 195 | 28  | 0     | 40    | 196   | 177  |             |             |          |                 |           |                     |                                                               |              |             |             |       |                 |           |            |               |               |             |             |       |                 |           |            |           |        | 1889         | VAPA        | TXNDC2,VAPA | VA PA | VAP A           | EN CO DE  | Tissue           | Tibial nerve        | tibial-nerve |
|         | 988393  | 18     | 8      | 3       | 7   | 4   | 195 | 28  | 0   | 40    | 196   | 33.72 | 823  |             |             |          |                 |           |                     |                                                               |              |             |             |       |                 |           |            |               |               |             |             |       |                 |           |            |           |        |              |             |             |       |                 |           |                  |                     |              |
|         | rs47991 | chr9   | 989991 | 790819  | 503 | 2   | 281 | 35  | 0   | 38    | 196   | 248   | 2416 |             |             |          |                 |           |                     |                                                               |              |             |             |       |                 |           |            |               |               |             |             |       |                 |           |            |           |        | VAPA         |             |             |       |                 |           |                  |                     |              |
| 988393  | 18      | 7      | 5      | 5       | 2   | 281 | 35  | 0   | 38  | 196   | 06.14 | 301   |      |             |             |          |                 |           |                     |                                                               |              |             |             |       |                 |           |            |               |               |             |             |       |                 |           |            |           |        |              |             |             |       |                 |           |                  |                     |              |
| rs47991 | chr9    | 990991 | 476667 | 633     | 2   | 167 | 19  | 0   | 35  | 196   | 895   | 1271  | VAPA | TXNDC2,VAPA | VA PA       | VAP A    | NC BI GE O/S RA | Stem cell | Umbilical cord      | umbilical-cord-derived-mesenchymal-stem-cells_Control_cycle_6 |              |             |             |       |                 |           |            |               |               |             |             |       |                 |           |            |           |        |              |             |             |       |                 |           |                  |                     |              |
| 988393  | 18      | 9      | 7      | 7       | 2   | 167 | 19  | 0   | 35  | 196   | 1.244 | 774   |      |             |             |          |                 |           |                     |                                                               |              |             |             |       |                 |           |            |               |               |             |             |       |                 |           |            |           |        |              |             |             |       |                 |           |                  |                     |              |
| rs47991 | chr9    | 991991 | 294661 | 448     | 1   | 54  | 8   | 0   | 31  | 196   | 388   | 563.  |      |             |             |          |                 |           |                     |                                                               | VAPA         | TXNDC2,VAPA | VA PA       | VAP A | NC BI GE O/S RA | Cell line | Pancreatic | L3-6_4SC-202  |               |             |             |       |                 |           |            |           |        |              |             |             |       |                 |           |                  |                     |              |
| 988393  | 18      | 8      | 1      | 1       | 1   | 54  | 8   | 0   | 31  | 196   | 14.98 | 0031  |      |             |             |          |                 |           |                     |                                                               |              |             |             |       |                 |           |            |               |               |             |             |       |                 |           |            |           |        |              |             |             |       |                 |           |                  |                     |              |
| rs47991 | chr9    | 991995 | 252402 | 549     | 6   | 568 | 100 | 3   | 80  | 400   | 311   | 3331  |      |             |             |          |                 |           |                     |                                                               |              |             |             |       |                 |           |            |               | VAPA          | TXNDC2,VAPA | VA PA       | VAP A | NC BI GE O/S RA | Cell line | Pancreatic | L3-6_DMSO |        |              |             |             |       |                 |           |                  |                     |              |
| 988393  | 18      | 7      | 0      | 0       | 6   | 568 | 100 | 3   | 80  | 400   | 11.45 | 888   |      |             |             |          |                 |           |                     |                                                               |              |             |             |       |                 |           |            |               |               |             |             |       |                 |           |            |           |        |              |             |             |       |                 |           |                  |                     |              |
| rs47991 | chr9    | 991991 | 294678 | 613     | 1   | 58  | 8   | 0   | 31  | 196   | 390   | 2377  |      |             |             |          |                 |           |                     |                                                               |              |             |             |       |                 |           |            |               |               |             |             |       |                 |           |            |           | VAPA   |              | TXNDC2,VAPA | VA PA       | VAP A | NC BI GE O/S RA | Cell line | Peripheral blood | CUTLL1_dimer-mutant |              |
| 988393  | 18      | 1      | 1      | 1       | 1   | 58  | 8   | 0   | 31  | 196   | 58.18 | 344   |      |             |             |          |                 |           |                     |                                                               |              |             |             |       |                 |           |            |               |               |             |             |       |                 |           |            |           |        |              |             |             |       |                 |           |                  |                     |              |
| rs47991 | chr9    | 986993 | 744453 | 236     | 8   | 966 | 152 | 7   | 80  | 715   | 840   | 6212  |      |             |             |          |                 |           |                     |                                                               |              |             |             |       |                 |           |            |               |               |             |             |       |                 |           |            |           |        | VAPA,TX NDC2 |             |             |       |                 |           |                  |                     | TXNDC2,VAPA  |
| 988393  | 18      | 4      | 3      | 3       | 8   | 966 | 152 | 7   | 80  | 715   | 55.81 | 441   |      |             |             |          |                 |           |                     |                                                               |              |             |             |       |                 |           |            |               |               |             |             |       |                 |           |            |           |        |              |             |             |       |                 |           |                  |                     |              |
| rs67863 | chr11   | 863864 | 747188 | 564     | 6   | 585 | 105 | 10  | 104 | 282   | 237   | 5093  | ME3  | ME3         | ME3         | NC BI GE | Tissue          | Pancreas  | pancreatic-islets-F |                                                               |              |             |             |       |                 |           |            |               |               |             |             |       |                 |           |            |           |        |              |             |             |       |                 |           |                  |                     |              |
| 073836  | 11      | 54     | 16     | 6       | 585 | 105 | 10  | 104 | 282 | 71.45 | 567   |       |      |             |             |          |                 |           |                     |                                                               |              |             |             |       |                 |           |            |               |               |             |             |       |                 |           |            |           |        |              |             |             |       |                 |           |                  |                     |              |

[illegible]



|                                                 |                                        |                                |                                         |                 |                       |                 |               |           |                                   |                  |                         |                                            |
|-------------------------------------------------|----------------------------------------|--------------------------------|-----------------------------------------|-----------------|-----------------------|-----------------|---------------|-----------|-----------------------------------|------------------|-------------------------|--------------------------------------------|
| Basal Accu<br>Gangl mbe<br>iaReg nsAr<br>ion ea | PT rs21469<br>H1 684 193<br>R 42 79    | chr<br>3                       | 469469<br>018356984 5 354 44 4 377 867  | 216<br>21. .644 | 8335 MYL3,PT<br>H1R   | PRSS42          | PT<br>H1<br>R | PTH1<br>R | Roa<br>dma<br>p                   | Tissue           | Right cardiac<br>atrium | right-cardiac-<br>atrium                   |
|                                                 | PT rs21469<br>H1 684 193<br>R 42 79    | chr<br>3                       | 469469<br>077358 92 2 297 36 4 317 581  | 259<br>97. .566 | 5614 PTH1R            | PRSS42,MYL3     | PT<br>H1<br>R | PTH1<br>R | NC<br>BI<br>GE<br>O/S<br>RA<br>NC | Tissue           | Kidney                  | Patient_x750N                              |
|                                                 | PT rs21469<br>H1 684 193<br>R 42 79    | chr<br>3                       | 469469<br>081422397 6 365 45 3 398 1132 | 211<br>02. .533 | 4535 PTH1R            | PRSS42,MYL3     | PT<br>H1<br>R | PTH1<br>R | BI<br>GE<br>O/S<br>RA<br>NC       | Tissue           | Skeletal muscle         | RMS008                                     |
|                                                 | PT rs21469<br>H1 684 193<br>R 42 79    | chr<br>3                       | 468469<br>990363625 3 385 52 4 387 1173 | 304<br>20. .661 | 5344 MYL3,PT<br>H1R   | PRSS42          | PT<br>H1<br>R | PTH1<br>R | BI<br>GE<br>O/S<br>RA             | Primar<br>y cell | Heart                   | purified<br>cardiomyocyte<br>G296S mutants |
|                                                 | PT rs14<br>H1 464 342<br>R 564 90<br>4 | chr<br>3                       | 469469<br>018356984 5 354 44 4 377 867  | 216<br>21. .644 | 8335 MYL3,PT<br>H1R   | PRSS42          | PT<br>H1<br>R | PTH1<br>R | Roa<br>dma<br>p                   | Tissue           | Right cardiac<br>atrium | right-cardiac-<br>atrium                   |
|                                                 | PT rs14<br>H1 464 342<br>R 564 90<br>4 | chr<br>3                       | 469469<br>077358 92 2 297 36 4 317 581  | 259<br>97. .566 | 5614 PTH1R            | PRSS42,MYL3     | PT<br>H1<br>R | PTH1<br>R | NC<br>BI<br>GE<br>O/S<br>RA<br>NC | Tissue           | Kidney                  | Patient_x750N                              |
|                                                 | PT rs14<br>H1 464 342<br>R 564 90<br>4 | chr<br>3                       | 469469<br>081422397 6 365 45 3 398 1132 | 211<br>02. .533 | 4535 PTH1R            | PRSS42,MYL3     | PT<br>H1<br>R | PTH1<br>R | BI<br>GE<br>O/S<br>RA<br>NC       | Tissue           | Skeletal muscle         | RMS008                                     |
|                                                 | PT rs14<br>H1 464 342<br>R 564 90<br>4 | chr<br>3                       | 468469<br>990363625 3 385 52 4 387 1173 | 304<br>20. .661 | 5344 MYL3,PT<br>H1R   | PRSS42          | PT<br>H1<br>R | PTH1<br>R | BI<br>GE<br>O/S<br>RA<br>NC       | Primar<br>y cell | Heart                   | purified<br>cardiomyocyte<br>G296S mutants |
|                                                 | IP<br>O7                               | rs75940<br>955 612<br>853 9 11 | 932942<br>805010 21 12 1482209 3 66 321 | 667<br>88. .326 | 9057 TMEM41<br>B,IPO7 | SNORA23,DENND5A | IPO<br>7      | IPO7      | NC<br>BI<br>GE<br>O/S<br>RA<br>NC | Stem<br>cell     | Embryo                  | Embryonic-stem-<br>cells_Naive             |
|                                                 | IP<br>O7                               | rs75940<br>955 612<br>853 9 11 | 938942<br>271798976 6 605 70 3 44 167   | 260<br>67. .046 | 4518 IPO7             | SNORA23,TMEM41B | IPO<br>7      | IPO7      | NC<br>BI<br>GE                    | Cell<br>line     | Lung                    | IMR-<br>90_proliferating                   |

[illegible]

6

[illegible]

|          |         |       |        |           |     |      |     |     |     |      |     |      |          |                       |           |                    |               |                                 |                                               |
|----------|---------|-------|--------|-----------|-----|------|-----|-----|-----|------|-----|------|----------|-----------------------|-----------|--------------------|---------------|---------------------------------|-----------------------------------------------|
|          |         |       |        |           |     |      |     |     |     |      |     |      |          |                       |           |                    |               |                                 | positive, alpha-beta<br>T cell                |
| IL2 3A   | rs79567 | chr12 | 567567 | 261361369 | 2   | 73   | 12  | 0   | 130 | 757  | 276 | 1559 | IL23A,ST | CNPY2,APOF,PAN2,CS    | IL2 3A    | Roa dma p          | Primar y cell | Blood                           | CD4-positive-<br>alpha-beta-<br>memory-T-cell |
| IL2 3A   | rs79567 | chr12 | 567567 | 261346441 | 2   | 60   | 11  | 0   | 126 | 631  | 274 | 1004 | IL23A,PA | CNPY2,STAT2,APOF,PAN2 | IL2 3A    | Roa dma p          | Primar y cell | Blood                           | CD8-positive-<br>alpha-beta-T-cell            |
| IL2 3A   | rs79567 | chr12 | 567567 | 262358370 | 2   | 68   | 11  | 0   | 130 | 717  | 291 | 1046 | IL23A,ST | CNPY2,APOF,PAN2,CS    | IL2 3A    | Roa dma p          | Primar y cell | Cord blood                      | T-cell                                        |
| IL2 3A   | rs79567 | chr12 | 567567 | 264356602 | 5   | 61   | 9   | 0   | 130 | 698  | 145 | 999  | IL23A,ST | CNPY2,APOF,PAN2,CS    | IL2 3A    | BI GE O/S RA NC    | Primar y cell | Blood                           | CD8donorA                                     |
| IL2 3A   | rs79567 | chr12 | 567567 | 262342926 | 1   | 55   | 11  | 0   | 126 | 618  | 235 | 988  | IL23A,PA | CNPY2,STAT2,APOF,PAN2 | IL2 3A    | BI GE O/S RA NC    | Cell line     | Peripheral blood                | MV411                                         |
| RE LL 1  | rs48376 | chr4  | 376377 | 486025905 | 9   | 781  | 37  | 6   | 104 | 291  | 307 | 7720 | RELL1    |                       | REL L1    | Roa dma p          | Tissue        | Large intestine                 | large-<br>intestine_108d                      |
| RE LL 1  | rs48376 | chr4  | 376377 | 662024    | 127 | 6    | 505 | 16  | 1   | 77   | 222 | 4682 | RELL1    |                       | REL L1    | Roa dma p          | Tissue        | Small intestine                 | small-<br>intestine_108days                   |
| RE LL 1  | rs48376 | chr4  | 376377 | 630026835 | 9   | 548  | 17  | 1   | 83  | 191  | 122 | 3310 | RELL1    |                       | REL L1    | Roa dma p          | Tissue        | Stomach                         | stomach_3y                                    |
| RE LL 1  | rs48376 | chr4  | 376377 | 332047550 | 8   | 1047 | 61  | 9   | 128 | 422  | 374 | 7284 | RELL1    | C4orf19               | REL L1    | EN CO DE           | Tissue        | Stomach                         | stomach                                       |
| M E M50A | rs30256 | chr1  | 256257 | 347106207 | 14  | 815  | 116 | 2   | 31  | 1148 | 760 | 8338 | RHD,TM   | RHD,TMEM57,RHCE       | TM EM 50A | TME M50A DE        | Cell line     | Submandibular<br>Salivary Gland | ACC112                                        |
| M E M50A | rs30256 | chr1  | 256256 | 344712495 | 5   | 412  | 74  | 0   | 18  | 741  | 292 | 7612 | RHD,TM   | RHD                   | TM EM 50A | TME M50A O/S RA NC | Cell line     | Endometrium                     | EEC16                                         |
| M E M50A | rs30256 | chr1  | 256257 | 349106    | 105 | 12   | 808 | 113 | 2   | 31   | 316 | 1114 | RHD,TM   | RHD,TMEM57,RHCE       | TM EM 50A | TME M50A GE        | Cell line     | Lung                            | IMR-<br>90_proliferating                      |



10

11



Cereb  
ellum  
Regio  
n

|            |       |        |                     |                 |   |     |     |    |     |      |                |           |              |                                        |        |        |                    |           |                   |                             |
|------------|-------|--------|---------------------|-----------------|---|-----|-----|----|-----|------|----------------|-----------|--------------|----------------------------------------|--------|--------|--------------------|-----------|-------------------|-----------------------------|
| ER rs25378 | chr17 | 378378 | BB 179 436 2 55 81  | 434476546 40 41 | 1 | 37  | 5   | 2  | 1   | 211  | 134 82.27      | 379.3503  | ERBB2,P GAP3 | C17orf37,GRB7,PNMT,ERB B2,TCAP         | ERB B2 | ERBB 2 | NC BI GE O/S RA NC | Stem cell | Embryo            | H7                          |
| ER rs25378 | chr17 | 378378 | BB 179 436 2 55 81  | 434473413 18 80 | 1 | 35  | 5   | 2  | 1   | 211  | 958 7.2 48     | 746.837   | ERBB2,P GAP3 | C17orf37,GRB7,PNMT,ERB B2,TCAP         | ERB B2 | ERBB 2 | NC BI GE O/S RA NC | Cell line | Embryo endodermal | CyT49_ES_D0                 |
| ER rs25378 | chr17 | 378378 | BB 179 436 2 55 81  | 426694 67 90    | 1 | 2   | 244 | 26 | 6   | 142  | 1358 464 821.1 | 1192 20.2 | ERBB2,P GAP3 | STARD3,C17orf37,GRB7,PNMT,TCAP         | ERB B2 | ERBB 2 | NC BI GE O/S RA NC | Cell line | Lung              | Calu-3                      |
| ER rs25378 | chr17 | 378378 | BB 179 436 2 55 81  | 432623672 03 27 | 3 | 186 | 21  | 4  | 99  | 633  | 892 1.3 46     | 1474.46   | ERBB2,P GAP3 | STARD3,C17orf37,GRB7,PNMT,TCAP         | ERB B2 | ERBB 2 | NC BI GE O/S RA NC | Stem cell | Embryo            | Embryonic-stem-cells_Primed |
| ER rs25378 | chr17 | 378378 | BB 179 436 2 55 81  | 281637141 49 77 | 4 | 344 | 72  | 10 | 117 | 1581 | 335 25.95      | 3131.701  | ERBB2,P GAP3 | PPP1R1B,STARD3,GRB7,C17orf37,PNMT,TCAP | ERB B2 | ERBB 2 | NC BI GE O/S RA NC | Cell line | Mammary Gland     | ZR-75-1_2                   |
| ER rs75378 | chr17 | 378378 | BB 849 437 2 983 62 | 434476546 40 41 | 1 | 37  | 5   | 2  | 1   | 211  | 134 82.27      | 379.3503  | ERBB2,P GAP3 | C17orf37,GRB7,PNMT,ERB B2,TCAP         | ERB B2 | ERBB 2 | NC BI GE O/S RA NC | Stem cell | Embryo            | H7                          |
| ER rs75378 | chr17 | 378378 | BB 849 437 2 983 62 | 434473413 18 80 | 1 | 35  | 5   | 2  | 1   | 211  | 958 7.2 48     | 746.837   | ERBB2,P GAP3 | C17orf37,GRB7,PNMT,ERB B2,TCAP         | ERB B2 | ERBB 2 | NC BI GE O/S RA NC | Cell line | Embryo endodermal | CyT49_ES_D0                 |
| ER rs75378 | chr17 | 378378 | BB 849 437 2 983 62 | 426694 67 90    | 1 | 2   | 244 | 26 | 6   | 142  | 1358 464 821.1 | 1192 20.2 | ERBB2,P GAP3 | STARD3,C17orf37,GRB7,PNMT,TCAP         | ERB B2 | ERBB 2 | NC BI GE O/S RA NC | Cell line | Lung              | Calu-3                      |
| ER rs75378 | chr17 | 378378 | BB 849 437 2 983 62 | 432623672 03 27 | 3 | 186 | 21  | 4  | 99  | 633  | 892 1.3 46     | 1474.46   | ERBB2,P GAP3 | STARD3,C17orf37,GRB7,PNMT,TCAP         | ERB B2 | ERBB 2 | NC BI GE O/S RA NC | Stem cell | Embryo            | Embryonic-stem-cells_Primed |

|            |       |        |           |   |     |    |    |     |      |     |       |          |                                                          |      |      |     |               |                                                         |                                      |
|------------|-------|--------|-----------|---|-----|----|----|-----|------|-----|-------|----------|----------------------------------------------------------|------|------|-----|---------------|---------------------------------------------------------|--------------------------------------|
| ER rs75378 | chr17 | 378378 | 281637141 | 4 | 344 | 72 | 10 | 117 | 1581 | 335 | 3131  | ERBB2,P  | PPP1R1B,STARD3,GRB7,C1ERB                                | ERBB | NC   | BI  | Cell line     | Mammary Gland                                           | ZR-75-1_2                            |
| BB 849 437 | 2     | 983 62 | 49 77     |   |     |    |    |     |      | 25  | .701  | GAP3     | 7orf37,PNMT,TCAP                                         | B2   | 2    | GE  |               |                                                         |                                      |
| FC rs29500 | chr19 | 500500 | 021320901 | 4 | 427 | 70 | 2  | 74  | 1719 | 267 | 2861  | FCGRT,R  | RPL13AP5,SNORD33,SNO                                     | FC   | FCGR | Roa | Tissue        | Spleen                                                  | spleen_30y                           |
| GR 468 103 | T     | 65 78  | 67 71     |   |     |    |    |     |      | 13  | .813  | PS11,MIR | RD34,SNORD32A,ALDH16                                     | GR   | T    | dma |               |                                                         |                                      |
|            |       |        |           |   |     |    |    |     |      | 24  |       | 150,RCN3 | A1,PIH1D1,SNORD35A,FLT3LG,SNORD35B                       | T    |      | p   |               |                                                         |                                      |
| FC rs29500 | chr19 | 500500 | 099208179 | 1 | 141 | 27 | 1  | 23  | 733  | 335 | 808   | FCGRT    | RPL13AP5,SNORD33,SNO                                     | FC   | FCGR | EN  | Cell line     | Brain: derived from metastatic site: supra-orbital area | SK-N-MC                              |
| GR 468 103 | T     | 65 78  | 69 33     |   |     |    |    |     |      | 06  | 2816  |          | RD34,SNORD32A,RPS11,RCN3,SNORD35A,FLT3LG,MIR150,SNORD35B | GR   | T    | CO  |               |                                                         |                                      |
|            |       |        |           |   |     |    |    |     |      | 75  |       |          |                                                          | T    |      | DE  |               |                                                         |                                      |
| FC rs11500 | chr19 | 500500 | 021320901 | 4 | 427 | 70 | 2  | 74  | 1719 | 267 | 2861  | FCGRT,R  | RPL13AP5,SNORD33,SNO                                     | FC   | FCGR | Roa | Tissue        | Spleen                                                  | spleen_30y                           |
| GR 329 281 | T     | 90 63  | 67 71     |   |     |    |    |     |      | 13  | .813  | PS11,MIR | RD34,SNORD32A,ALDH16                                     | GR   | T    | dma |               |                                                         |                                      |
|            |       |        |           |   |     |    |    |     |      | 24  |       | 150,RCN3 | A1,PIH1D1,SNORD35A,FLT3LG,SNORD35B                       | T    |      | p   |               |                                                         |                                      |
| TR rs11496 | chr19 | 496496 | 510703451 | 2 | 313 | 41 | 0  | 114 | 2028 | 295 | 4527  | HRC,TRP  | RPL13AP5,SNORD33,SNO                                     | TRP  | TRPM | Roa | Tissue        | Lung                                                    | lung_3y                              |
| PM 882 615 | 4     | 563 47 | 32 98     |   |     |    |    |     |      | 60  | .771  | M4,PPFIA | LIN7B,C19orf73,TRPM4                                     | M4   | 4    | dma |               |                                                         |                                      |
|            |       |        |           |   |     |    |    |     |      | 26  |       | 3        |                                                          |      |      | p   |               |                                                         |                                      |
| TR rs11496 | chr19 | 496496 | 515711550 | 3 | 332 | 43 | 0  | 105 | 1980 | 918 | 1996  | HRC,TRP  | RPL13AP5,SNORD33,SNO                                     | TRP  | TRPM | EN  | Tissue        | Prostate                                                | prostate                             |
| PM 882 615 | 4     | 563 47 | 89 99     |   |     |    |    |     |      | 1.4 | .298  | M4,PPFIA | LIN7B,C19orf73,TRPM4                                     | M4   | 4    | CO  |               |                                                         |                                      |
|            |       |        |           |   |     |    |    |     |      | 02  |       | 3        |                                                          |      |      | DE  |               |                                                         |                                      |
|            |       |        |           |   |     |    |    |     |      |     |       |          |                                                          |      |      | NC  |               |                                                         |                                      |
| TR rs11496 | chr19 | 496496 | 518696255 | 3 | 299 | 39 | 0  | 105 | 1895 | 147 | 2429  | HRC,TRP  | RPL13AP5,SNORD33,SNO                                     | TRP  | TRPM | BI  | Cell line     | Prostate                                                | C4-2B_vehicle_24h                    |
| PM 882 615 | 4     | 563 47 | 20 48     |   |     |    |    |     |      | 99  | .956  | M4,PPFIA | LIN7B,C19orf73,TRPM4                                     | M4   | 4    | GE  |               |                                                         |                                      |
|            |       |        |           |   |     |    |    |     |      | 02  |       | 3        |                                                          |      |      | O/S |               |                                                         |                                      |
|            |       |        |           |   |     |    |    |     |      |     |       |          |                                                          |      |      | RA  |               |                                                         |                                      |
|            |       |        |           |   |     |    |    |     |      |     |       |          |                                                          |      |      | NC  |               |                                                         |                                      |
| TR rs11496 | chr19 | 496496 | 514747292 | 4 | 385 | 50 | 0  | 142 | 2322 | 423 | 501   | HRC,TRP  | RPL13AP5,SNORD33,SNO                                     | TRP  | TRPM | BI  | Tissue        | Endometrioid                                            | endometrioid_ade                     |
| PM 882 615 | 4     | 563 47 | 04 33     |   |     |    |    |     |      | 93  | .5735 | M4,PPFIA | LIN7B,C19orf73,TRPM4                                     | M4   | 4    | GE  |               |                                                         |                                      |
|            |       |        |           |   |     |    |    |     |      | 46  |       | 3        |                                                          |      |      | O/S |               |                                                         | nocarcinoma_TumorA                   |
|            |       |        |           |   |     |    |    |     |      |     |       |          |                                                          |      |      | RA  |               |                                                         |                                      |
|            |       |        |           |   |     |    |    |     |      |     |       |          |                                                          |      |      | NC  |               |                                                         |                                      |
| TR rs11496 | chr19 | 496496 | 526723431 | 2 | 342 | 46 | 0  | 129 | 1968 | 328 | 1829  | HRC,TRP  | RPL13AP5,SNORD33,SNO                                     | TRP  | TRPM | BI  | Primar y cell | Heart                                                   | purified cardiomyocyte WT            |
| PM 882 615 | 4     | 563 47 | 96 29     |   |     |    |    |     |      | 38  | .796  | M4,PPFIA | LIN7B,C19orf73,TRPM4                                     | M4   | 4    | GE  |               |                                                         |                                      |
|            |       |        |           |   |     |    |    |     |      | 16  |       | 3        |                                                          |      |      | O/S |               |                                                         |                                      |
|            |       |        |           |   |     |    |    |     |      |     |       |          |                                                          |      |      | RA  |               |                                                         |                                      |
|            |       |        |           |   |     |    |    |     |      |     |       |          |                                                          |      |      | NC  |               |                                                         |                                      |
| TR rs11496 | chr19 | 496496 | 509725505 | 3 | 362 | 50 | 0  | 147 | 2313 | 306 | 2233  | HRC,TRP  | RPL13AP5,SNORD33,SNO                                     | TRP  | TRPM | BI  | Primar y cell | Heart                                                   | purified cardiomyocyte G296S mutants |
| PM 882 615 | 4     | 563 47 | 75 59     |   |     |    |    |     |      | 57  | .944  | M4,PPFIA | LIN7B,C19orf73,TRPM4                                     | M4   | 4    | GE  |               |                                                         |                                      |
|            |       |        |           |   |     |    |    |     |      | 91  |       | 3        |                                                          |      |      | O/S |               |                                                         |                                      |
|            |       |        |           |   |     |    |    |     |      |     |       |          |                                                          |      |      | RA  |               |                                                         |                                      |
| TR rs11496 | chr19 | 496496 | 510703451 | 2 | 313 | 41 | 0  | 114 | 2028 | 295 | 4527  | HRC,TRP  | RPL13AP5,SNORD33,SNO                                     | TRP  | TRPM | Roa | Tissue        | Lung                                                    | lung_3y                              |
| PM 083 653 | 4     | 963 40 | 32 98     |   |     |    |    |     |      | 60  | .771  | M4,PPFIA | LIN7B,C19orf73,TRPM4                                     | M4   | 4    | dma |               |                                                         |                                      |
|            |       |        |           |   |     |    |    |     |      | 26  |       | 3        |                                                          |      |      | p   |               |                                                         |                                      |

15

16

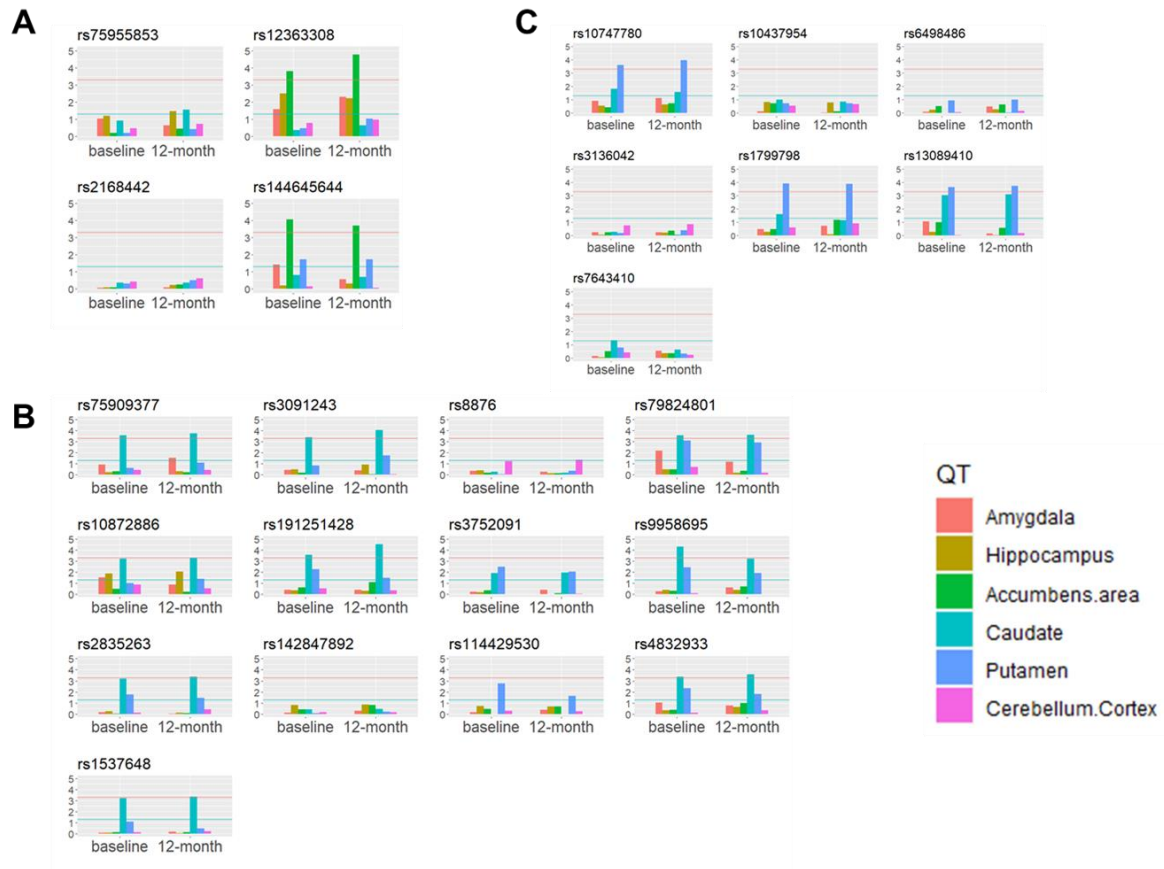

Figure S1. Bar plots of associations between 26 SNPs in basal ganglia region and 6 subcortical structures. (A) 4 SNPs derived from previous step in accumbens area. (B) 13 SNPs derived from previous step in caudate. (C) 7 SNPs derived from previous step in putamen. X-axial presents six subcortical structures (amygdala, hippocampus, accumbens area, caudate, putamen and cerebellum cortex) at baseline and 12-month's follow-up. Y-axial presents the p-value ( $-\log_{10}$ ) of association based on QT-GWAS. Blue horizontal line represents  $-\log_{10}(0.05)$  while red horizontal line represents  $-\log_{10}(5e-4)$ .

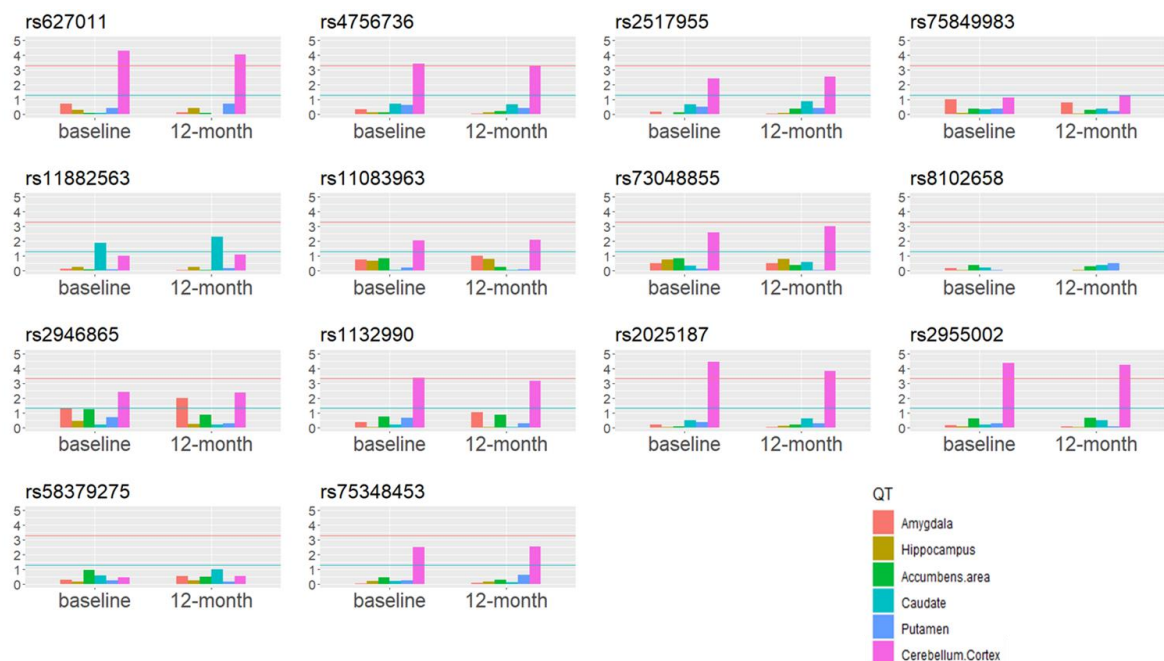

Figure S2. Bar plots of associations between 14 SNPs in cerebellum region and 6 subcortical structures. X-axial presents six subcortical structures (amygdala, hippocampus, accumbens area, caudate, putamen and cerebellum cortex) at baseline and 12-month's follow-up. Y-axial presents the p-value ( $-\log_{10}$ ) of association based on QT-GWAS. Blue horizontal line represents  $-\log_{10}(0.05)$  while red horizontal line represents  $-\log_{10}(5e-4)$ .
